# Supplementary material for: Construction of and electrophoretic fluorescence imaging with a nano-porous polyaniline–fluorescein conducting particle system
Source: Royal Society of Chemistry journal article supplement (doi:10.1039/b818773h), 2009-01-01

## Electronic Supplementary Information

**Title:** Construction of and Electrophoretic Fluorescence Imaging with a Nano-Porous Polyaniline-Fluorescein Conducting Particle System

Ki-Whan Chi,<sup>a</sup> Ho Yun Hwang,<sup>a</sup> Sung Ho Jin,<sup>b</sup> Han Mo Jeong,<sup>a</sup> Koo Sik Yoon,<sup>a</sup> Jong-Man Kim,<sup>c</sup> and Chan Woo Lee,<sup>\*a</sup>

<sup>a</sup> Department of Chemistry, University of Ulsan, Ulsan 680-749, Korea

<sup>b</sup> Department of Chemistry Education, Pusan National University, 609-735, Korea.

<sup>c</sup> Department of Chemical Engineering, Hanyang University, 133-791, Seoul, Korea.

Fax: (+82)52-259-2348

E-mail: lcw5113@ulsan.ac.kr

Supporting data 1: The stability of the nanoparticles in the presence of 5% tetrabutylammonium fluoride salt for EB-fluorescein and ES(HCl)-fluorescein nanoparticles by UV irradiation (UV illuminator: Ushio Inc. equipped with a 500W Hg-Xe lamp narrow band-pass filter at 360 nm wavelength (700 mJ/cm<sup>2</sup>).

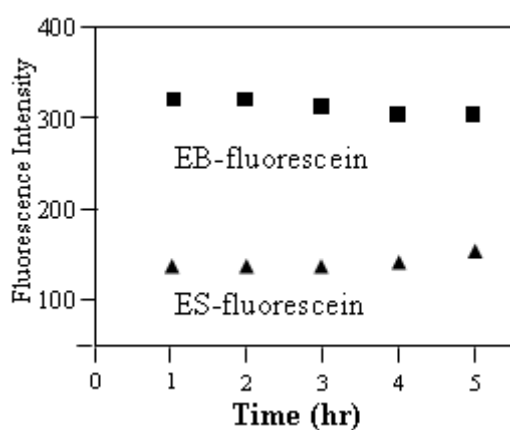

Supplement: b818773h.pdf [file b818773h.pdf]
